# Supplementary material
Source: Elsevier journal article supplement (https://www.sciencedirect.com/science/article/pii/S2007505716300345)

ANEXO

INSTRUMENTO

Carta envío

La Jefatura Nacional de Residentes ISSSTE ha diseñado este cuestionario en su versión electrónica, con el propósito de obtener información relevante que permita realizar un tamizaje del nivel de salud de los médicos residentes ISSSTE, para detección de riesgos psicolaborales y estado de agotamiento emocional. Además de identificar oportunidades de mejora en el proceso de formación como médicos especialistas.

Es importante que sus respuestas sean honestas, la Jefatura Nacional de Residentes ISSSTE le garantiza la confidencialidad de sus respuestas, ya que el acceso a los datos que proporcionen los residentes, quedan para uso exclusivo de los responsables de este estudio.

**Con el propósito de no favorecer cansancio y como consecuencia falta de objetividad o precisión en las respuestas le solicitamos contestarla antes de tener guardia.**
**La encuesta incluye los siguientes dominios: 1) datos generales, 2) evaluación de Burnout y 3) calidad de vida profesional**

A usted se le está invitando a participar en este estudio de investigación epidemiológica, en caso de haber comprendido la información anterior y consentir participar en esta investigación siga la dirección electrónica al final de la página.

RECOMENDACIONES:

- Dependiendo de la velocidad de su conexión a la internet, el cambio entre una página y la subsecuente puede tardar algunos segundos, sea paciente. Observe la barra de descarga en la línea de estado de su navegador, esto puede servirle de guía para identificar la velocidad del proceso.
- No deje preguntas sin responder. El cuestionario no avanzará a la siguiente página si los datos no se han incluido en cada respuesta o si existe algún error. Si este fuera el caso, en la parte superior de la pregunta correspondiente, aparecerá un aviso en letras color rojo. Verifique su respuesta.
- Para avanzar a la página siguiente haga click en el botón "SIGUIENTE" que está al final de la página en la que Ud. se encuentre. Al terminar el llenado del cuestionario presione el botón "FINALIZADO" y el cuestionario con sus respuestas se enviará automáticamente.

JNR agradece de antemano su participación

Para llenar la encuesta sigue el link

**Encuesta Nacional de Residentes ISSSTE**

Como médicos especialistas en formación nos enfrentamos a diferentes exigencias de trabajo y el equilibrio entre los requisitos del trabajo en la institución y las posibilidades de rendimiento de cada sujeto origina la aparición de riesgos psicosociales. La Jefatura Nacional de Residentes interesada en saber tu estado de salud elaboró esta encuesta, los resultados servirán para identificar áreas de oportunidad e implementar medidas para tu beneficio. Te pedimos contestar con honestidad.

1. Sexo *

Femenino

Masculino

1. ¿Cuándo naciste? *

Ejemplo: Diciembre 15, 1988

1. Estado Civil *

Solter@, Casad@, Unión libre, Divorciad@, Viud@

4 Especialidad *

Elige una especialidad directa y si es el caso especifica subespecialidad

Anestesiología

Cirugía General

Ginecología y Obtetricia

Imagenología

Medicina Interna

Medicina Familiar

Oftalmología

Otorrinolaringologia

Pediatría

Psiquiatría

Traumatología y Ortopedia

Urgencias médico Quirúrgicas

Otra:

1. ¿Cuántos años de residencia has cursado? *

Si es el caso suma los años que realizaste de especialidad troncal más los años de la subespecialidad.

1, 2, 3, 4, 5 o más

1. ¿Cuántas guardias realizas a la semana? *

1, 2, 3, 4 o más

1. ¿Cuánto pesas? * kilogramos
2. ¿Cuánto mides? * metros
3. ¿cuántos pacientes atiendes en un día promedio? *

menos de 20, 21 a 50, 51 a 100, más de 100

1. ¿Qué tan feliz eres cuando estás en el trabajo? *

Extremadamente feliz, Muy feliz, Algo feliz, Neutral, Algo infeliz, Muy infeliz, Extremadamente infeliz

1. ¿Qué tan feliz eres cuando estas en casa? *

Extremadamente feliz

Muy feliz, Algo feliz, Neutral, Algo infeliz, Muy infeliz

Extremadamente infeliz

1. ¿Realizas ejercicio? *

30 min al día

No, Menos de una vez al Mes, Una vez a la semana, Más de 2 veces por semana

13 En la actualidad ¿estás enferm@? *

Si, No

1. ¿De qué?

Escribe la enfermedad que padeces

1. ¿Cuántas personas dependen de ti económicamente? *

0, 1, 2, 3, 4, 5 o más,

1. ¿En qué ocupas tu tiempo libre? *

Puedes elegir más de una opción

Descansar

Trabajo voluntario

Actividades culturales

Ejercicio Físico

Familia

Actividades sociales

Otro:

1. ¿Cómo calificarías tu calidad de vida? *

Muy mala, Regular, Normal, Bastante buena, Muy buena

18 ¿Cómo calificarías tu sede actual? *

Elige una opción del 1 al 10

1 Muy mala, 2, 3, 4, 5, 6, 7, 8, 9, 10. Cumple por completo mis expectativas

Las siguientes preguntas hacen referencia al grado en que has experimentado ciertos hechos en las cuatro últimas semanas

1. La cantidad de trabajo que tengo es *

Nada, Un poco, Lo normal, Bastante, Mucho

1. Prisas y agobios por falta de tiempo para realizar mi trabajo *

Nada, Un poco, Lo normal, Bastante, Mucho

21 Presión que recibo para realizar la cantidad de trabajo que tengo *

Nada, Un poco, Lo normal, Bastante, Mucho

1. Presión que recibo para mantener la calidad de mi trabajo

Nada, Un poco, Lo normal, Bastante, Mucho

1. Tengo conflictos con otras personas de mi trabajo *

Nunca, Raramente, Lo normal, Frecuentemente, Siempre

24. Falta de tiempo para mi vida personal *

Nunca, Raramente, Lo normal, Frecuentemente, Siempre

25 Incomodidad física en el trabajo *

Nunca, Raramente, Lo normal, Frecuentemente, Siempre

1. Carga de responsabilidad *

Nada, Un poco, Lo normal, Bastante, Mucho

1. Interrupciones molestas * mientras realizas tu trabajo

Nunca, Raramente, Lo normal, Frecuentemente, Siempre

1. ¿Crees que tu trabajo te genera estrés (esfuerzo emocional)? *

Nada, Un poco, Lo normal, Bastante, Mucho

29 ¿Tu trabajo tiene consecuencias negativas para tu salud?*

Nunca, Raramente, Lo normal, Frecuentemente, Siempre

1. ¿Estás satisfecho con el tipo de trabajo que realizas? *

Nunca, Raramente, Lo normal, Frecuentemente, Siempre

1. ¿Te sientes motivado o con ganas de esforzarte al realizar tu trabajo? *

Nunca, Raramente, Lo normal, Frecuentemente, Siempre

1. ¿Se te exige capacitación para realizar tu trabajo? *

Nunca, Raramente, Lo normal, Frecuentemente, Siempre

33 ¿Te sientes apoyado por tu familia? * para realizar tu trabajo

Nunca, Raramente, Lo normal, Frecuentemente, Siempre

1. ¿Te dan ganas de ser creativo mientras realizas tu trabajo? *

Nunca, Raramente, Lo normal, Frecuentemente, Siempre

1. ¿Estás capacitado para el trabajo que realizas? *

Nada, Un poco, Lo normal, Bastante, Mucho

1. ¿Sientes que tu trabajo es importante para la vida de otras personas? *

Nunca, Raramente, Lo normal, Frecuentemente, Siempre

37 ¿Te sientes orgulloso de tu trabajo? *

Nunca, Raramente, Lo normal, Frecuentemente, Siempre

1. ¿Está claro lo que tienes que hacer en tu trabajo? *

Nunca, Raramente, Lo normal, Frecuentemente, Siempre

1. ¿Tienes apoyo de tu equipo? *

Enfermería

Nunca, Raramente, Lo normal, Frecuentemente, Siempre

1. Durante la ejecución de tu trabajo, ¿hay posibilidad de expresar lo que sientes y necesitas? *

Nunca, Raramente, Lo normal, Frecuentemente, Siempre

41 ¿Estás satisfecho con tu sueldo? *

Un poco, Lo normal, Bastante, Mucho

1. ¿Hay reconocimiento a tu esfuerzo? *

Nada, Un poco, Lo normal, Bastante, Mucho

1. ¿Hay posibilidad de ser promovido en tu trabajo? *

Nada, Un poco, Lo normal, Bastante, Mucho

1. ¿Tienes apoyo de tus jefes y residentes de mayor jerarquía? *

Nada, Un poco, Lo normal, Bastante, Mucho,

45 ¿Tienes apoyo de otros compañeros residentes del mismo grado? *

Nada, Un poco, Lo normal, Bastante, Mucho

1. ¿Recibes información de los resultados de tu trabajo? *

Nada, Un poco, Lo normal, Bastante, Mucho

47. ¿Tu institución trata de mejorar la calidad de vida de tu puesto? *

Nada, Un poco, Lo normal, Bastante, Mucho

1. ¿Tienes autonomía o libertad de decisión? *

Nada, Un poco, Lo normal, Bastante, Mucho

49 ¿Hay variedad en tu trabajo? *

Nada, Un poco, Lo normal, Bastante, Mucho

1. ¿Hay posibilidad de ser creativo en tu trabajo? *

Nada, Un poco, Lo normal, Bastante, Mucho

1. Si haces una propuesta ¿es posible que sea escuchada? *

Nada, Un poco, Lo normal, Bastante, Mucho

1. Al terminar tu jornada o guardia ¿es posible que te desconectes de tu trabajo? *

Nada, Un poco, Lo normal, Bastante, Mucho

Las siguientes preguntas hacen referencia al año actual de la especialidad

53 Me siento emocionalmente agotado por mi trabajo *

Nunca, Pocas veces al año o menos, Una vez al mes o menos, Unas pocas veces al mes o menos, Una vez a la semana, Pocas veces a la semana, Todos los días

1. Me siento agotado al final de la jornada de trabajo *

Nunca, Pocas veces al año o menos, Una vez al mes o menos, Unas pocas veces al mes o menos, Una vez a la semana, Pocas veces a la semana, Todos los días

1. Me siento fatigado cuando me levanto por la mañana y debo enfrentar otro día de trabajo*

Nunca, Pocas veces al año o menos, Una vez al mes o menos, Unas pocas veces al mes o menos, Una vez a la semana, Pocas veces a la semana, Todos los días

56 Comprendo fácilmente como se sienten los pacientes *

Nunca, Pocas veces al año o menos, Una vez al mes o menos, Unas pocas veces al mes o menos, Una vez a la semana, Pocas veces a la semana, Todos los días

1. Creo que trato a algunos pacientes como si fueran objetos impersonales *

Nunca, Pocas veces al año o menos, Una vez al mes o menos, Unas pocas veces al mes o menos, Una vez a la semana, Pocas veces a la semana, Todos los días

1. Trabajar todo el día con mucha gente representa una verdadera tensión para mí *

Nunca, Pocas veces al año o menos, Una vez al mes o menos, Unas pocas veces al mes o menos, Una vez a la semana, Pocas veces a la semana, Todos los días

59 Trato muy eficazmente los problemas de los pacientes *

Nunca, Pocas veces al año o menos, Una vez al mes o menos, Unas pocas veces al mes o menos, Una vez a la semana, Pocas veces a la semana, Todos los días

1. Me siento quemado/acabado por mi trabajo *

Nunca, Pocas veces al año o menos, Una vez al mes o menos, Unas pocas veces al mes o menos, Una vez a la semana, Pocas veces a la semana, Todos los días

1. Creo que influyo positivamente con mi trabajo en la vida de las personas *

Nunca, Pocas veces al año o menos, Una vez al mes o menos, Unas pocas veces al mes o menos, Una vez a la semana, Pocas veces a la semana, Todos los días

62 Me he vuelto más insensible con la gente desde que ejerzo esta profesión *

Nunca, Pocas veces al año o menos, Una vez al mes o menos, Unas pocas veces al mes o menos, Una vez a la semana, Pocas veces a la semana, Todos los días

1. Me preocupa el hecho de que este trabajo me endurezca emocionalmente *

Nunca, Pocas veces al año o menos, Una vez al mes o menos, Unas pocas veces al mes o menos, Una vez a la semana, Pocas veces a la semana, Todos los días

1. Me siento muy activo *

Nunca, Pocas veces al año o menos, Una vez al mes o menos, Unas pocas veces al mes o menos, Una vez a la semana, Pocas veces a la semana, Todos los días

65 Me siento frustrado en mi trabajo *

Nunca, Pocas veces al año o menos, Una vez al mes o menos, Unas pocas veces al mes o menos, Una vez a la semana, Pocas veces a la semana, Todos los días

1. Creo que estoy trabajando demasiado *

Nunca, Pocas veces al año o menos, Una vez al mes o menos, Unas pocas veces al mes o menos, Una vez a la semana, Pocas veces a la semana, Todos los días

1. Realmente no me preocupa lo que le ocurre a mis pacientes *

Nunca, Pocas veces al año o menos, Una vez al mes o menos, Unas pocas veces al mes o menos, Una vez a la semana, Pocas veces a la semana, Todos los días

68 Trabajar directamente con personas me produce estrés *

Nunca, Pocas veces al año o menos, Una vez al mes o menos, Unas pocas veces al mes o menos, Una vez a la semana, Pocas veces a la semana, Todos los días

1. Puedo crear fácilmente una atmósfera relajada con mis pacientes *

Nunca, Pocas veces al año o menos, Una vez al mes o menos, Unas pocas veces al mes o menos, Una vez a la semana, Pocas veces a la semana, Todos los días

1. Me siento estimulado después de trabajar con mis pacientes *

Nunca, Pocas veces al año o menos, Una vez al mes o menos, Unas pocas veces al mes o menos, Una vez a la semana, Pocas veces a la semana, Todos los días

71 He conseguido muchas cosas útiles en mi profesión *

Nunca, Pocas veces al año o menos, Una vez al mes o menos, Unas pocas veces al mes o menos, Una vez a la semana, Pocas veces a la semana, Todos los días

1. Me siento acabado *

Nunca, Pocas veces al año o menos, Una vez al mes o menos, Unas pocas veces al mes o menos, Una vez a la semana, Pocas veces a la semana, Todos los días

1. En mi trabajo trato los problemas emocionales con mucha calma *

Nunca, Pocas veces al año o menos, Una vez al mes o menos, Unas pocas veces al mes o menos, Una vez a la semana, Pocas veces a la semana, Todos los días

74 Siento que los pacientes me culpan por algunos de sus problemas *

Nunca, Pocas veces al año o menos, Una vez al mes o menos, Unas pocas veces al mes o menos, Una vez a la semana, Pocas veces a la semana, Todos los días

1. ¿Con qué frecuencia tienes sentimientos negativos, tales como tristeza, desesperanza, ansiedad o depresión? *

Nunca, Raramente, Moderadamente, Siempre

1. ¿Cómo calificarías tu sede actual? *

Elige una opción del 1 al 10

Muy mala, 2, 3, 4, 5, 6, 7, 8, 9, 10. Cumple por completo mis expectativas

Gracias por tu ayuda.

Secretaria de Enseñanza e Investigación

Jefatura Nacional de Residentes ISSSTE 2015­2016

1. ¿Te gustaría hacer algún comentario sobre el cuestionario?

Síguenos en

http://jnrissste.com/ https://www.facebook.com/jnrissste

#orgulloissste


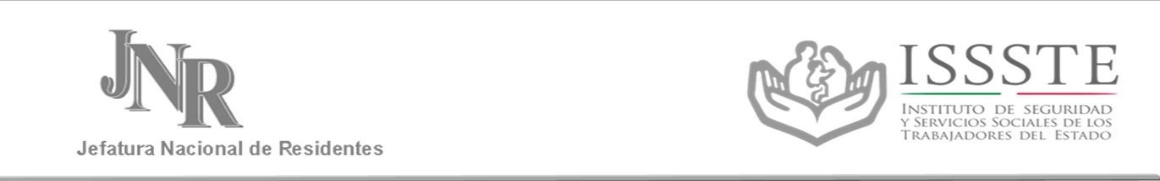

Supplement: mmc1 [file S2007505716300345:mmc1.docx]
